# Supplementary material for: Influence of the defect of activated carbon surface on cigarette smoke components adsorption: A DFT study
Source: Research Square preprint supplement (doi:10.21203/rs.3.rs-7504559/v1), 2025-10-09
Supplement: Supplementary file 1 [file 5ddb03c0f0c65582060285be.docx]

**Supplementary Material**

**Influence of the defect of activated carbon surface on cigarette smoke components adsorption: A DFT study**

Xinxin Li1,2, Lu Ning1,2, Jiangfei Yin3, Jing Che1,2, Congxin Chen1,2, Qiang Liu1,2, Hongyun Hu4*

*1 China Tobacco Hubei Industrial Co., Ltd., Wuhan 430070, P. R. China;*

*2 China Tobacco Hubei Industrial of Cigarette Material Co., Ltd., Wuhan 430040,P. R. China;*

*3 Future-Tech Innovation Institute, Wuhan 430058,P. R. China;*

*4 State key Laboratory of Coal Combustion, School of Energy and Power Engineering, Huazhong University of Science and Technology, Wuhan, 430074, China*

Total number of pages: 8

Total number of table and figures: 12

**Figure and Table captions**

**Fig. S1.** Adsorption structures of CO on activated carbon (AC).

**Table S1** Adsorption energy of CO on activated carbon (AC).

**Fig. S2.** Adsorption structures of nicotine on activated carbon (AC).

**Table S2** Adsorption energy of nicotine on activated carbon (AC).

**Fig. S3.** Adsorption structures of phenol on activated carbon (AC).

**Table S3** Adsorption energy of phenol on activated carbon (AC).

**Fig. S4.** Adsorption structures of CO on defective activated carbon (AC1).

**Table S4** Adsorption energy of CO on defective activated carbon (AC1).

**Fig. S5.** Adsorption structures of nicotine on defective activated carbon (AC1).

**Table S5** Adsorption energy of nicotine on defective activated carbon (AC1).

**Fig. S6.** Adsorption structures of phenol on defective activated carbon (AC1).

**Table S6** Adsorption energy of phenol on defective activated carbon (AC1).


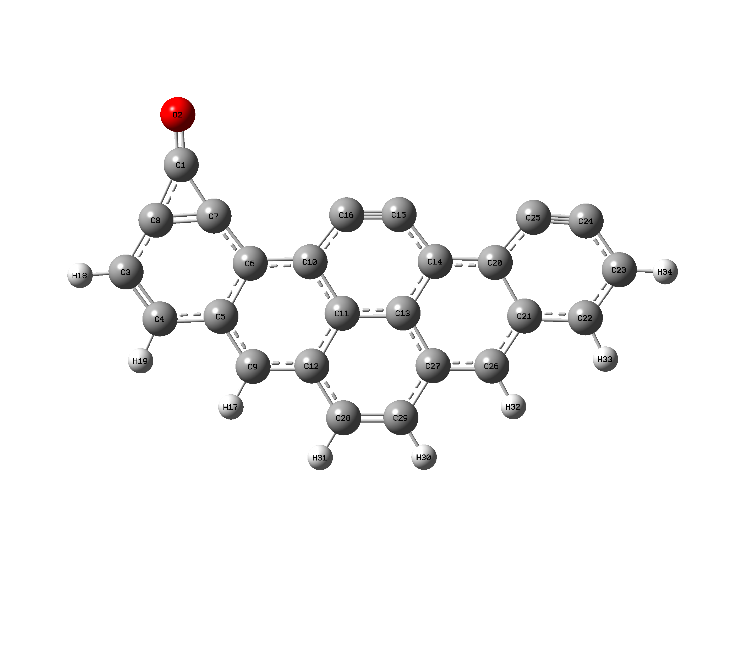

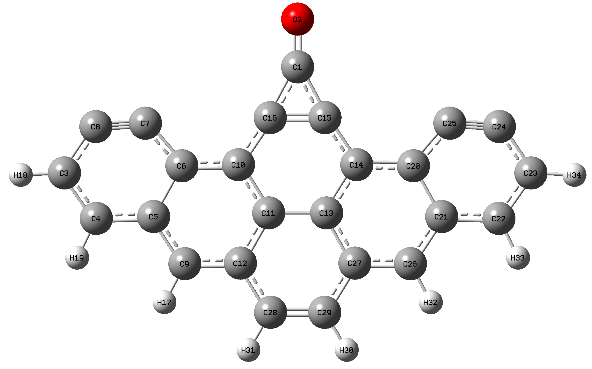


S1-1. AC-CO S1-2. AC-N2O

**Fig. S1.** Adsorption structures of CO on activated carbon (AC).

**Table S1 Adsorption energy of CO on activated carbon (AC)**

| Structure | Eads (kJ/mol) |
| --- | --- |
| S1-1. AC-CO | -161.16 |
| S1-2. AC-CO | -159.72 |


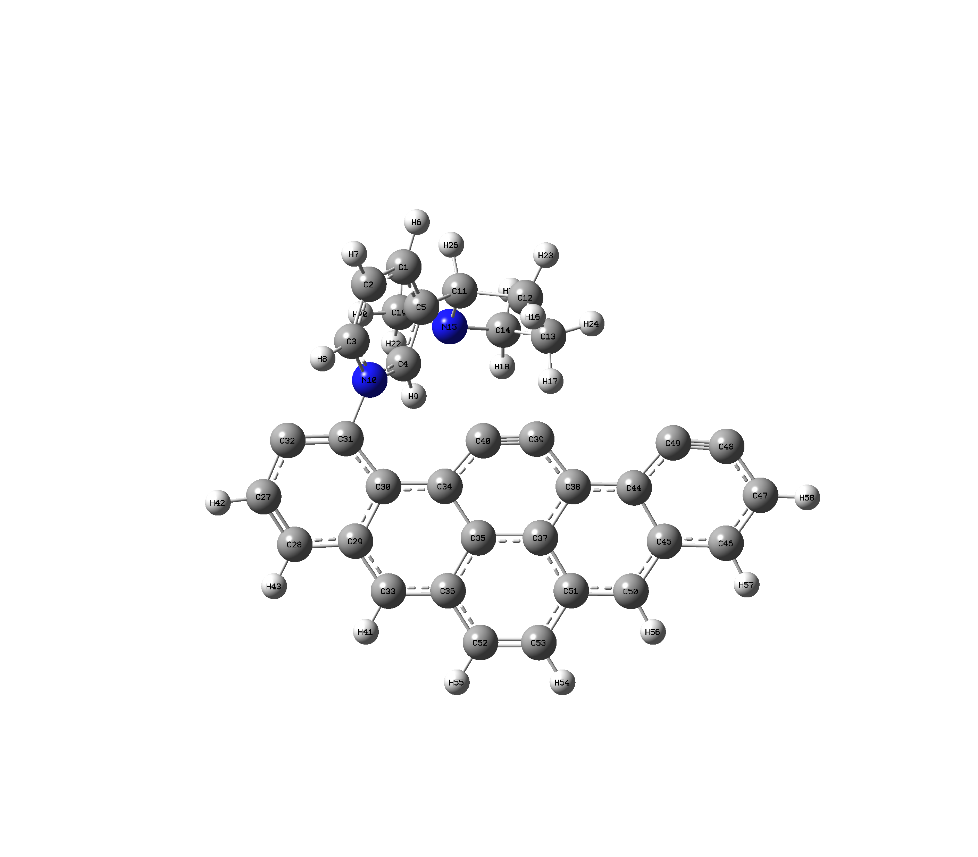

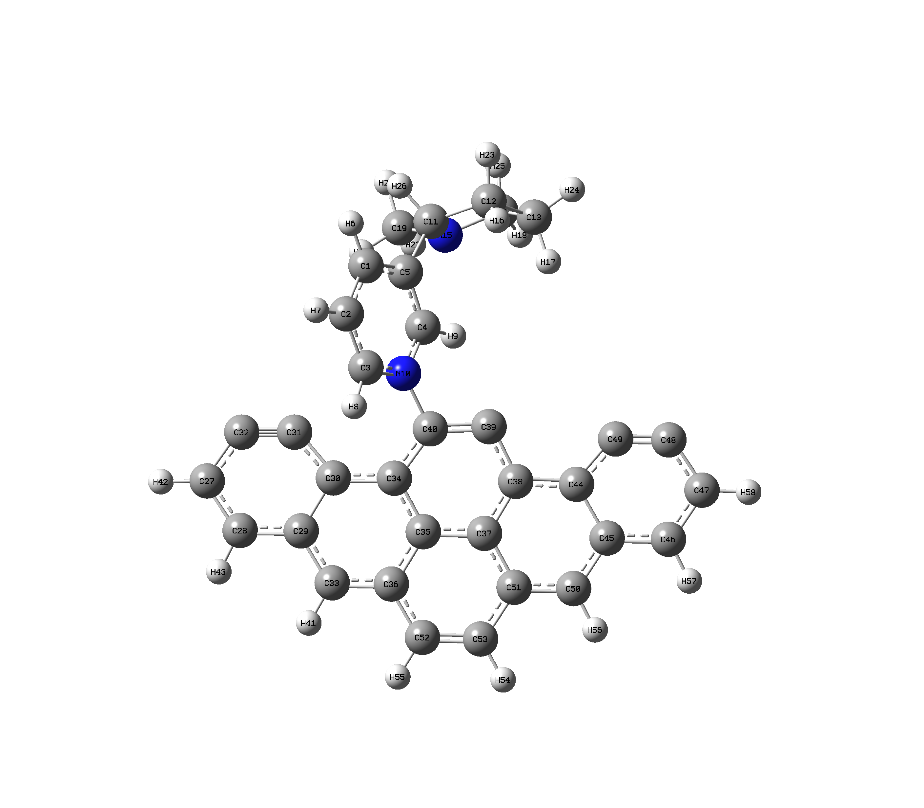


S2-1. AC-nicotine S2-2. AC-nicotine


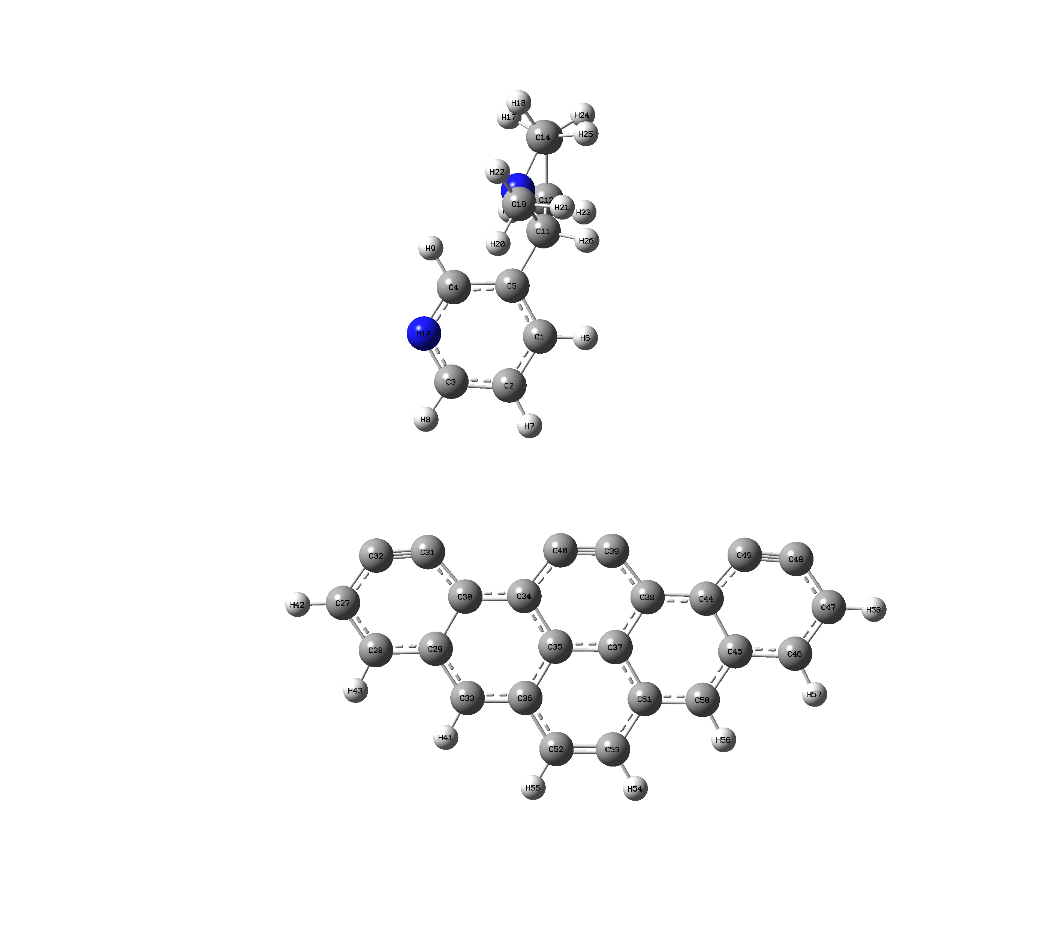

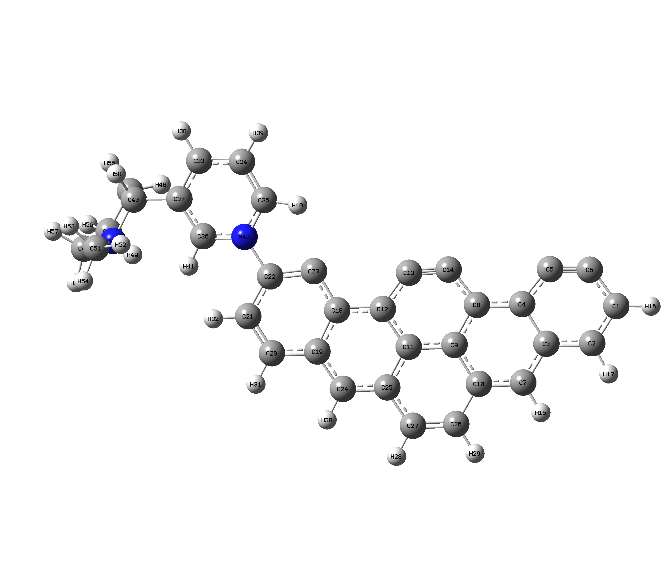


S2-3. AC-nicotine S2-4. AC-nicotine

**Fig. S2.** Adsorption structures of nicotine on activated carbon (AC).

**Table S2 Adsorption energy of nicotine on activated carbon (AC)**

| Structure | Eads (kJ/mol) |
| --- | --- |
| S2-1. AC-nicotine | -85.07 |
| S2-2. AC-nicotine | -90.77 |
| S2-3. AC-nicotine | -4.36 |
| S2-4. AC-nicotine | -112.38 |


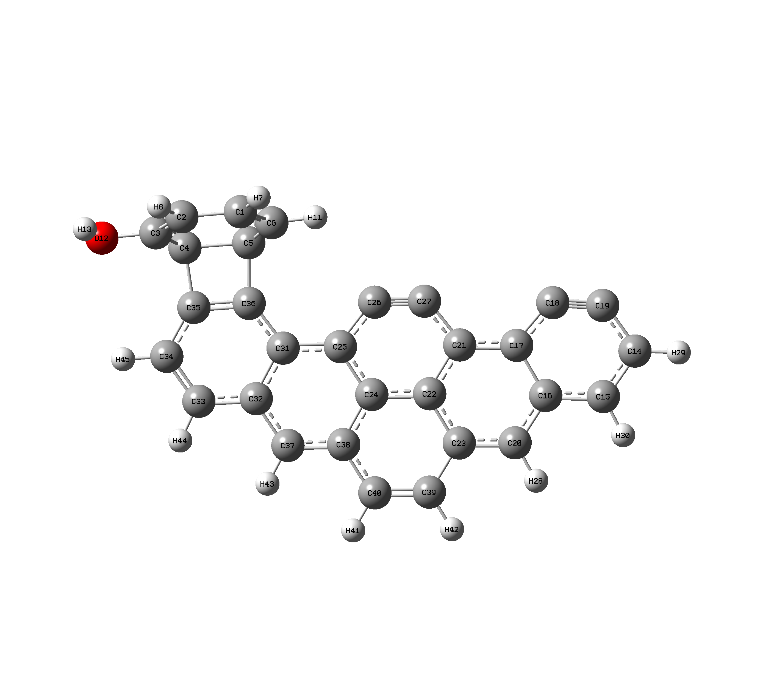

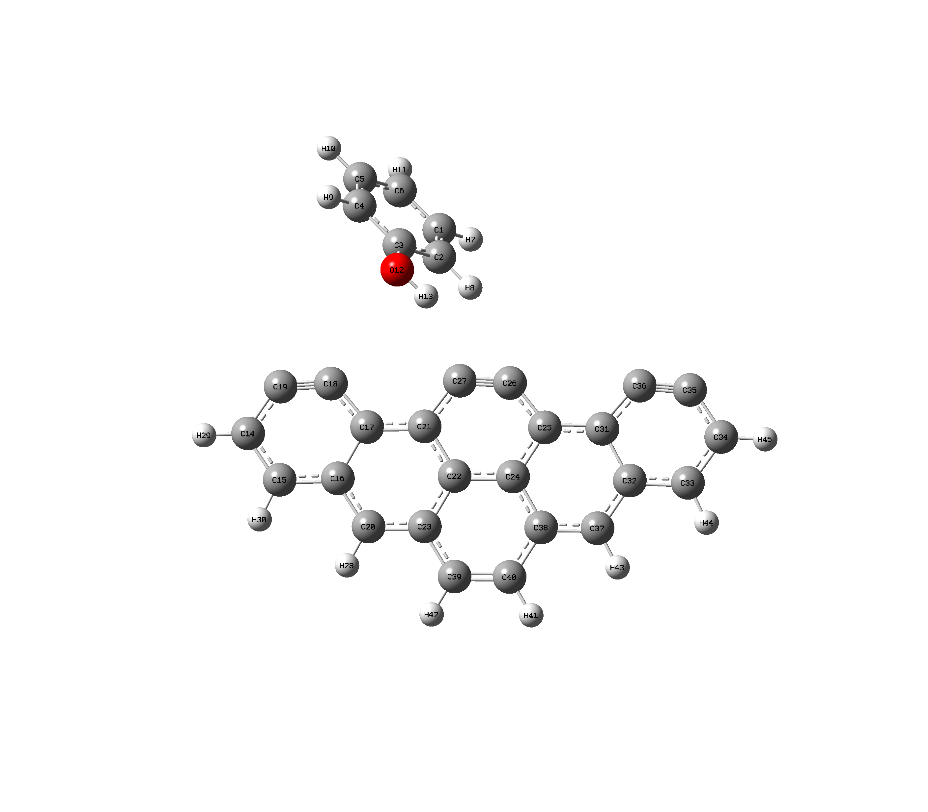


S3-1. AC-phenol S3-2. AC-phenol


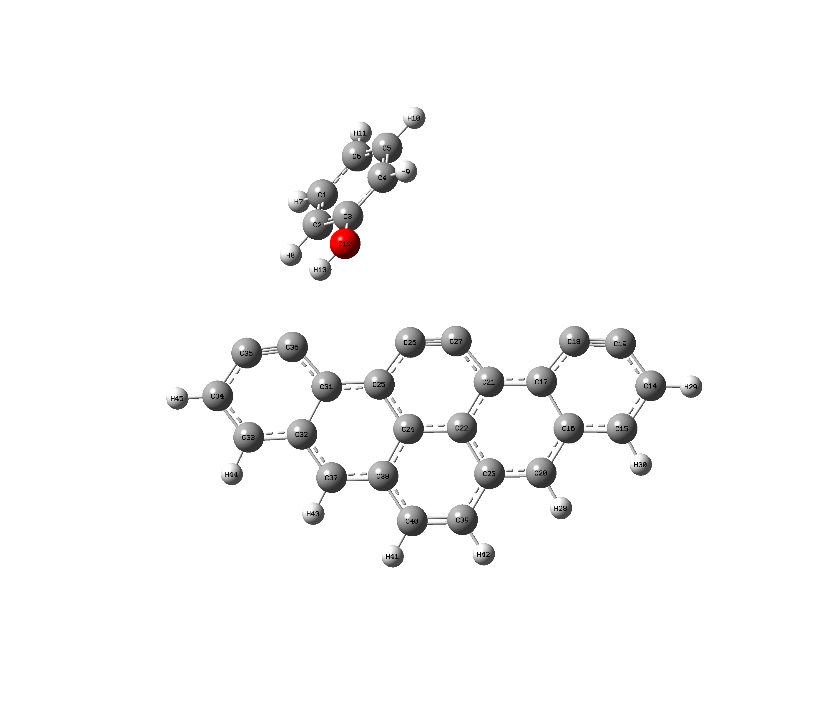


S3-3. AC-phenol

**Fig. S3.** Adsorption structures of phenol on activated carbon (AC).

**Table S3 Adsorption energy of phenol on activated carbon (AC)**

| Structure | Eads (kJ/mol) |
| --- | --- |
| S3-1. AC-phenol | -186.95 |
| S3-2. AC-phenol | -13.13 |
| S3-3. AC-phenol | -13.32 |


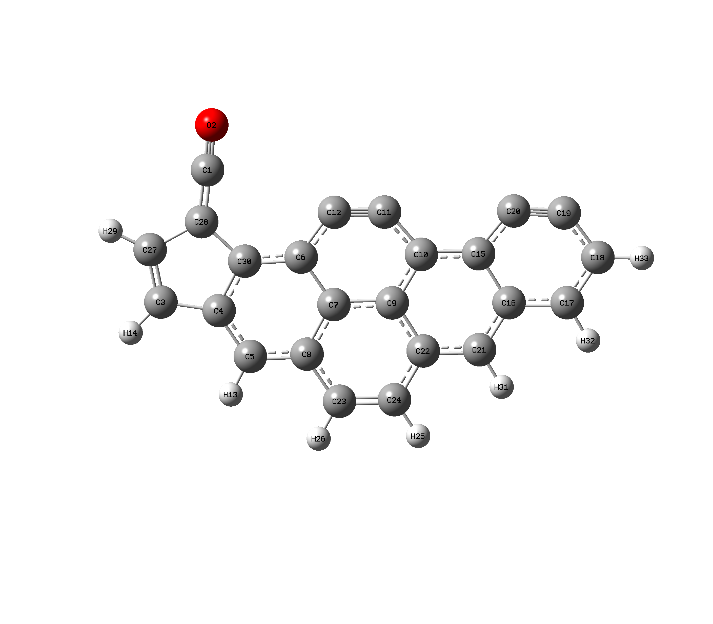

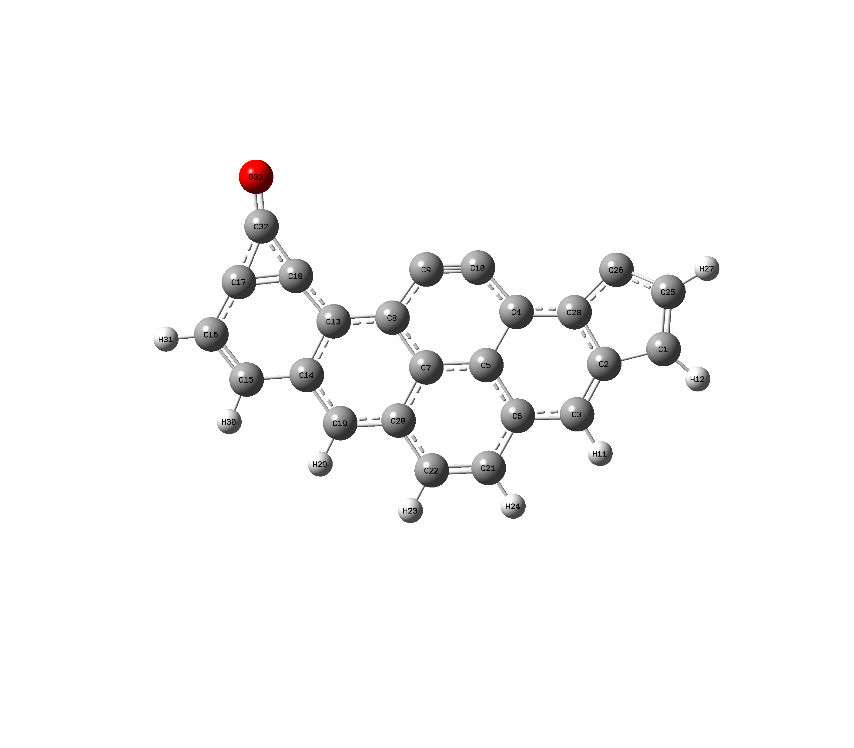


S4-1. AC1-CO S4-2. AC1-N2O

**Fig. S4.** Adsorption structures of CO on defective activated carbon (AC1).

**Table S4 Adsorption energy of CO on defective activated carbon (AC1)**

| Structure | Eads (kJ/mol) |
| --- | --- |
| S4-1. AC1-CO | -359.98 |
| S4-2. AC1-CO | -160.04 |


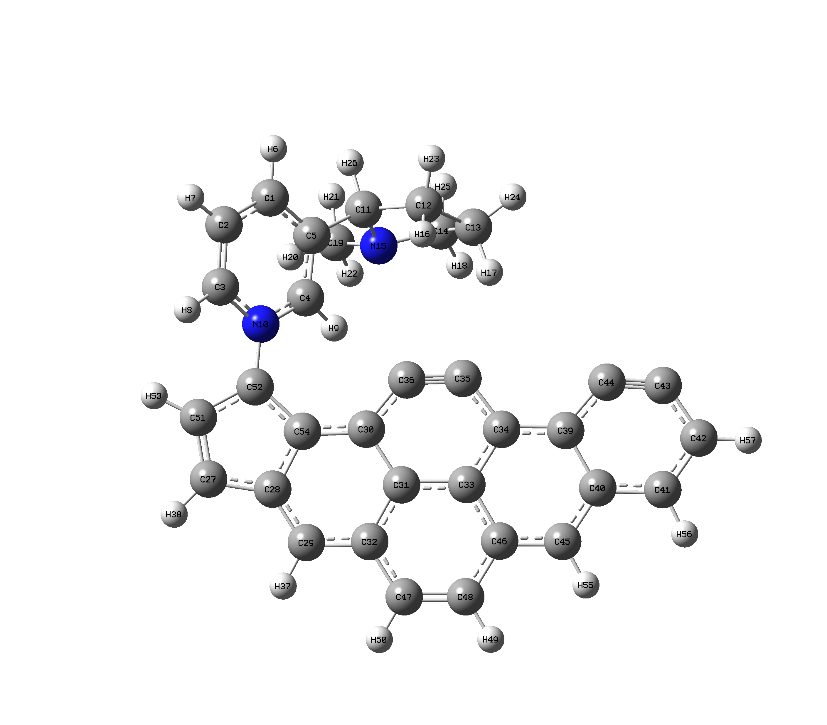

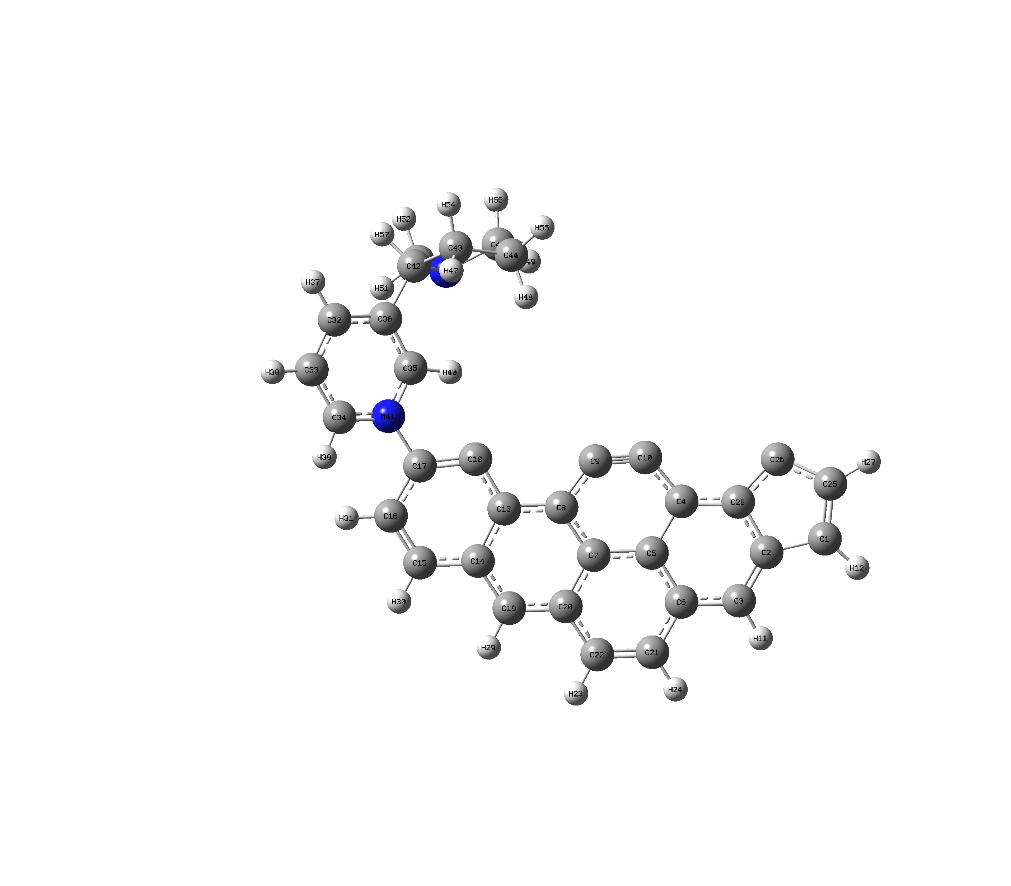


S5-1. AC1-nicotine S5-2. AC1-nicotine


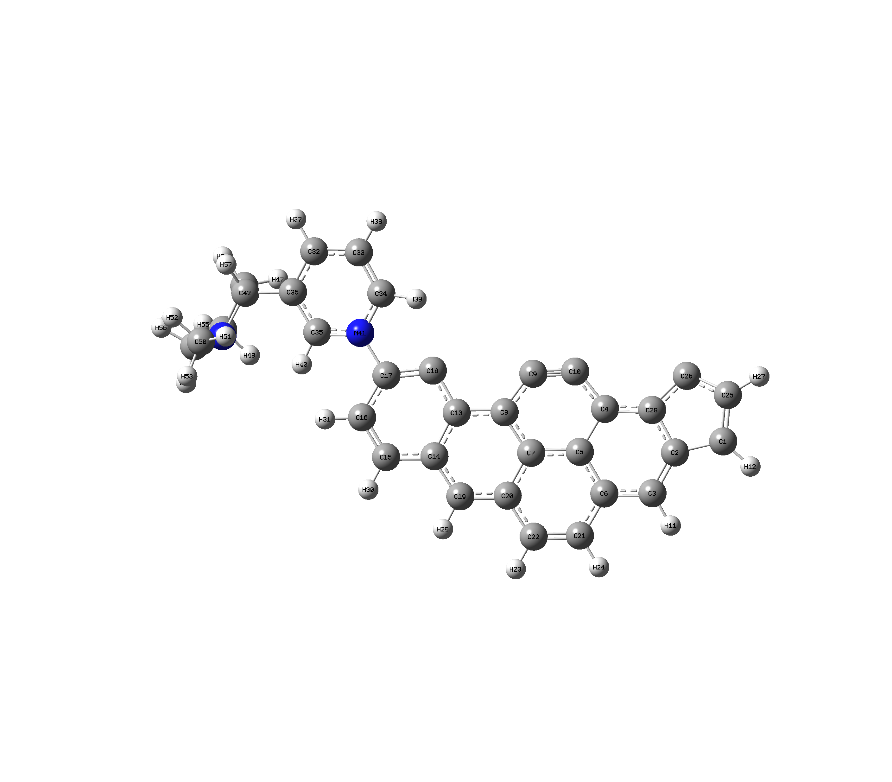

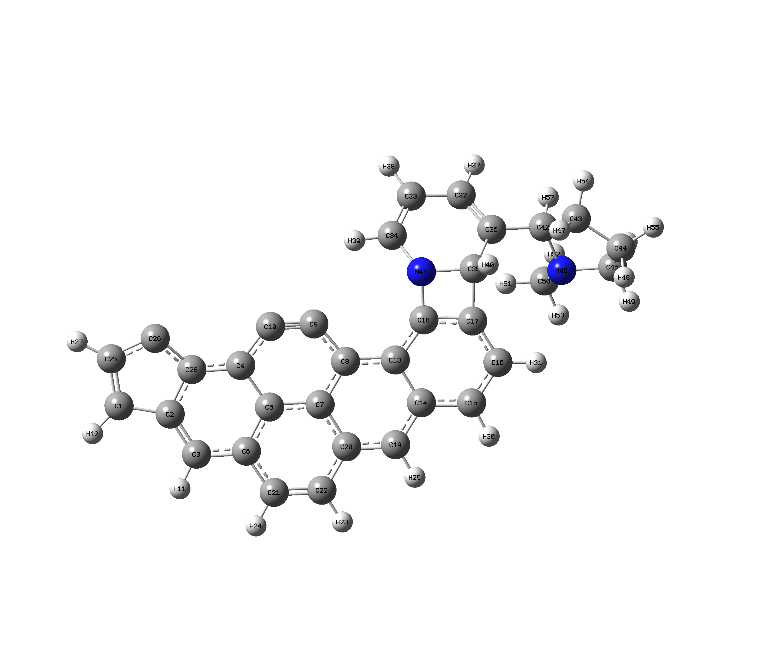


S5-3. AC1-nicotine S5-4. AC1-nicotine

**Fig. S5.** Adsorption structures of nicotine on defective activated carbon (AC1).

**Table S5 Adsorption energy of nicotine on defective activated carbon (AC1)**

| Structure | Eads (kJ/mol) |
| --- | --- |
| S5-1. AC1-nicotine | -320.18 |
| S5-2. AC1-nicotine | -109.90 |
| S5-3. AC1-nicotine | -111.89 |
| S5-4. AC1-nicotine | -165.87 |


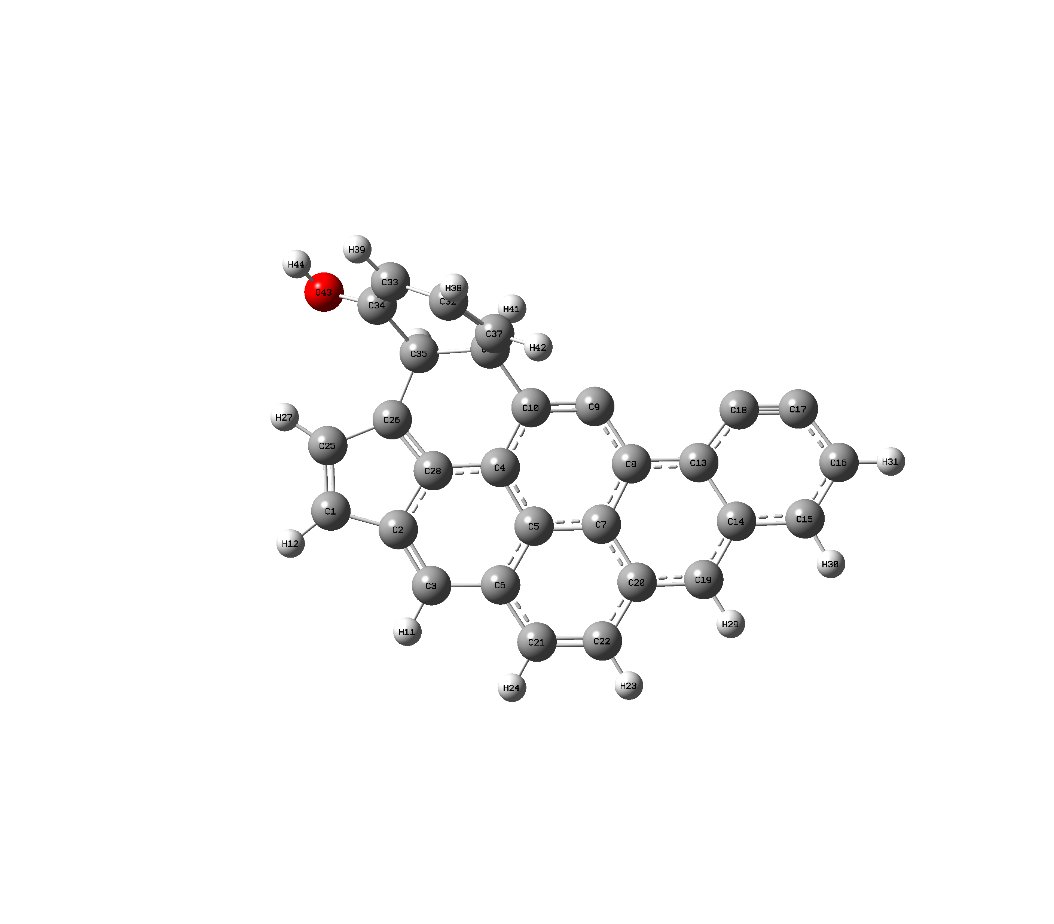

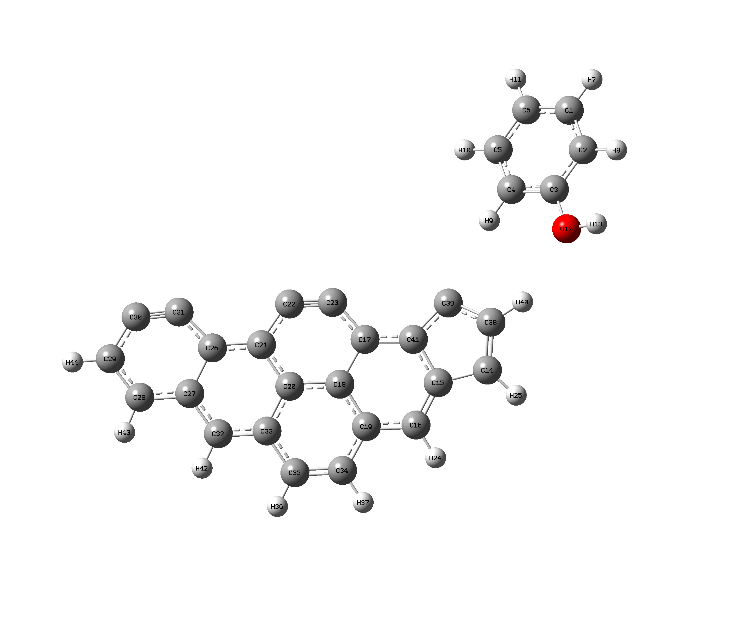


S6-1. AC1-phenol S6-2. AC1-phenol


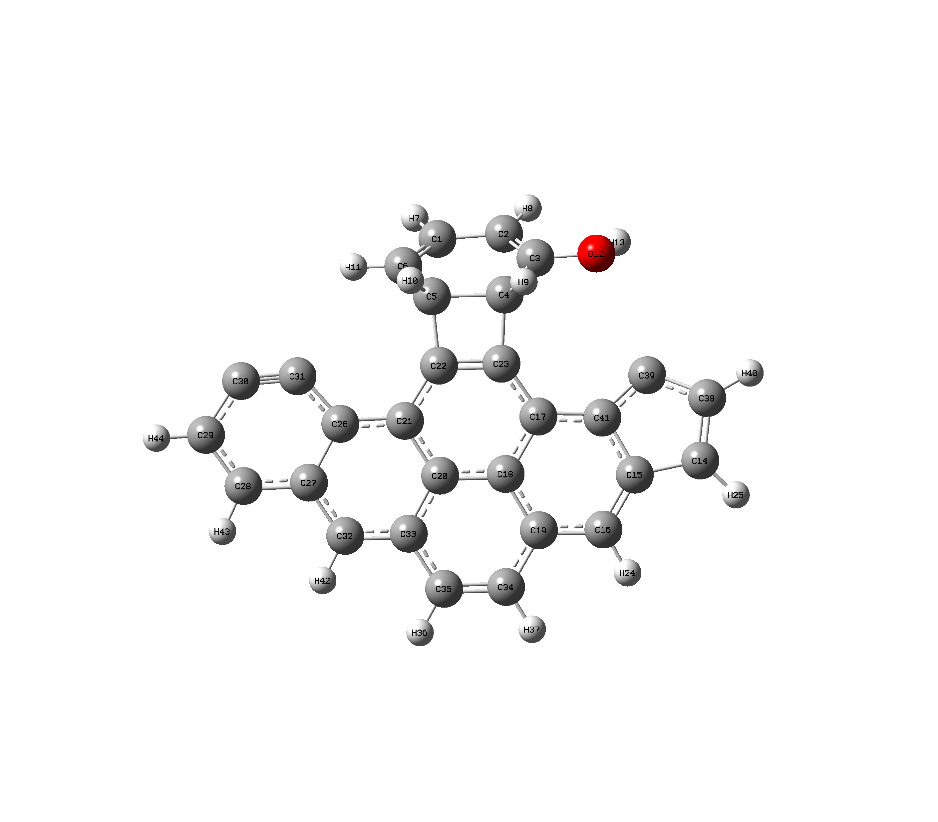

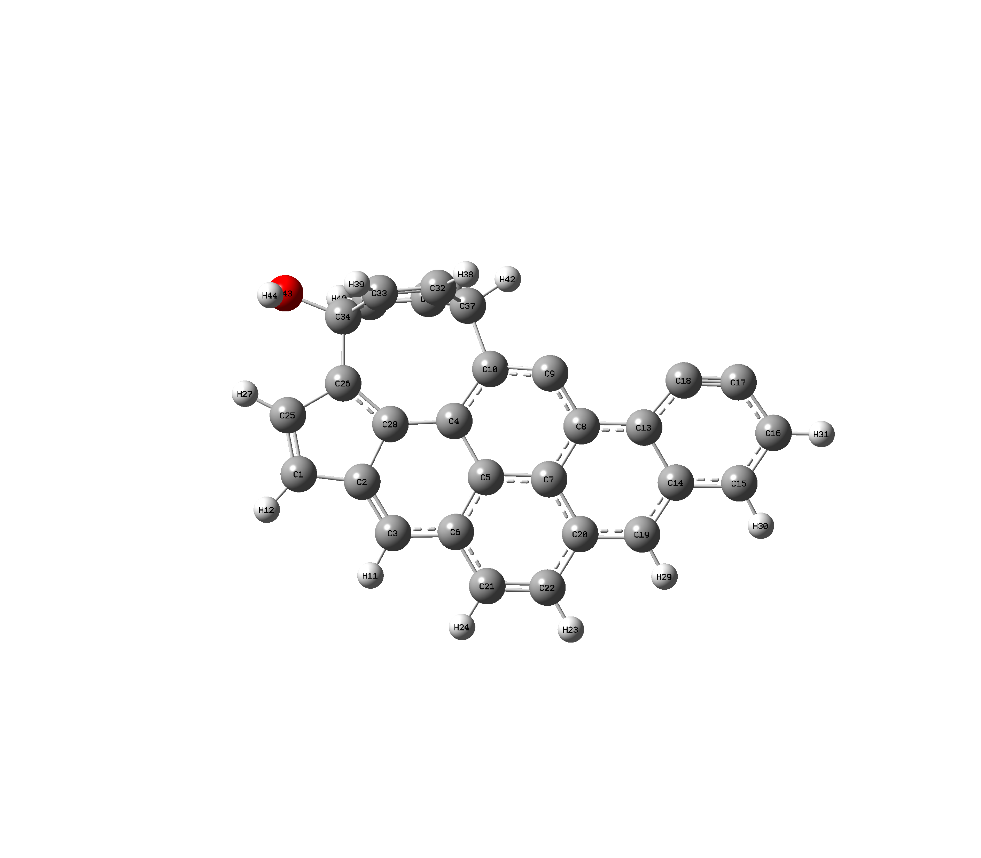


S6-3. AC1-phenol S6-4. AC1-phenol

**Fig. S6.** Adsorption structures of phenol on defective activated carbon (AC1).

**Table S6 Adsorption energy of phenol on defective activated carbon (AC1)**

| Structure | Eads (kJ/mol) |
| --- | --- |
| S6-1. AC1-phenol | -259.84 |
| S6-2. AC1-phenol | -12.83 |
| S6-3. AC1-phenol | -176.08 |
| S6-4. AC1-phenol | -204.49 |
